RESEARCH ARTICLE

# Subthreshold depression prevalence and influencing factors among nursing students in vocational schools: A cross-sectional study

Ruoying Cheng<sup>1\*</sup>, Wei Zhu<sup>2</sup>, Shuyu Jiang<sup>3</sup>, Zijuan Yang<sup>1</sup>

**1** Nursing Department, Wuxi Higher Health Vocational Technology School, Jiangsu Union Technical Institute, Wuxi, Jiangsu Province, PRC, **2** Psychological Department, The Affiliated Wuxi Mental Health Center of Jiangnan University, Wuxi, Jiangsu Province, PRC, **3** Psychological Counselling Center, Wuxi Higher Health Vocational Technology School, Jiangsu Union Technical Institute, Wuxi, Jiangsu Province, PRC

\* [gemini\\_crystal@163.com](mailto:gemini_crystal@163.com)

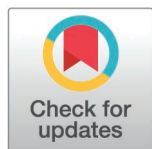

**OPEN ACCESS**

**Citation:** Cheng R, Zhu W, Jiang S, Yang Z (2026) Subthreshold depression prevalence and influencing factors among nursing students in vocational schools: A cross-sectional study. PLoS One 21(4): e0346701. <https://doi.org/10.1371/journal.pone.0346701>

**Editor:** Aline Siteneski, Universidad Técnica de Manabí: Universidad Tecnica de Manabi, ECUADOR

**Received:** October 8, 2025

**Accepted:** March 23, 2026

**Published:** April 20, 2026

**Copyright:** © 2026 Cheng et al. This is an open access article distributed under the terms of the [Creative Commons Attribution License](https://creativecommons.org/licenses/by/4.0/), which permits unrestricted use, distribution, and reproduction in any medium, provided the original author and source are credited.

**Data availability statement:** The data that support the findings of this study are openly available at <https://doi.org/10.6084/m9.figshare.31879318>.

**Funding:** This work was supported by the Science Foundation of Wuxi Health Committee

## Abstract

### Background

Subthreshold depression (SD) is defined as a subclinical symptomatic state characterized by depressive symptoms that do not meet diagnostic criteria yet still impair quality of life and functioning. The prevalence of this condition is notably high among adolescents. Vocational nursing students, as a vital component of healthcare provision, face a range of pressures. Consequently, the incidence of subthreshold depression among this cohort and its contributing factors warrant careful consideration.

### Objectives

We aimed to investigate the prevalence of subthreshold depression among vocational nursing students in eastern China and to explore the related factors.

### Methods

Purposive sampling was employed to select nursing students from nine vocational colleges in eastern China. Data on respondents' general characteristics, family type, cognitive attitudes, social support, resilience, personality traits, and depression status were gathered to ascertain the correlation between each variable and the associated factors of subthreshold depression. Multivariable binary logistic regression was utilised to formulate a regression model that elucidated the factors associated with subthreshold depression among vocational nursing students.

### Results

The prevalence rate for subthreshold depression among vocational nursing students was found to be 54.3%. SD students showed relatively unhealthy cognitive attitudes

(Grant NO.M202162) (<https://wjw.wuxi.gov.cn/gggs/index.shtml>) and the Jiangsu University Philosophy and Social Sciences Research Project (NO.2022SJYB0754) ([https://jyt.jiangsu.gov.cn/art/2022/7/12/art\\_58320\\_10546853.html](https://jyt.jiangsu.gov.cn/art/2022/7/12/art_58320_10546853.html)). The author who received two grants is RY C. The sponsors provided financial support and offered suggestions on the initial research direction (study design stage). They had no role in data collection and analysis, decision to publish, or preparation of the manuscript.

**Competing interests:** The authors have declared that no competing interests exist.

and heightened emotional sensitivity and instability, as well as lower levels of family functioning, social support, and psychological resilience. Logistic regression analysis revealed that among respondents, female gender, DAS and CBF-PI-B-Neuroticism trait were independently and positively associated with SD after adjustment for confounders. In contrast, social support and resilience were independently and negatively associated with SD ( $P < 0.05$ ).

## Conclusions

Students at vocational nursing schools exhibit a relatively high prevalence of sub-threshold depression, with multiple contributing factors. Various stakeholders, including the state, communities, hospitals, academic institutions, and families, should develop and share resources to develop relevant programmes to improve the mental health of vocational nursing students in China.

## 1. Introduction

Subthreshold depression (SD), also termed subclinical or sub-syndromal depression, denotes the presence of depressive symptoms that do not meet the diagnostic criteria for major depressive disorder (MDD) [1]. The condition is frequently accompanied by persistent fatigue, impaired memory, insomnia, and difficulty concentrating, and it may even involve suicidal tendencies. It is frequently regarded as a precursor to major depressive disorder [2,3].

In recent decades, subthreshold depression has been the focus of mounting attention. Currently, there is no consensus on the definition of subthreshold depression in terms of the number, frequency, and duration of symptoms. According to epidemiological studies, the morbidity of subthreshold depression in the population is 14–30% [4,5]. Approximately 29.2% of adolescents are affected by SD, with the prevalence of this condition increasing steadily between the ages of 12 and 20 [6,7]. Furthermore, between 10% and 20% of patients with subthreshold depression will convert to MDD [8]. Although subthreshold depression is characterised by a lower severity rating than that of MDD, it nevertheless exerts a significant impact on quality of life, resulting in increased functional disability and mortality. Moreover, it constitutes a considerable physical, mental, and economic burden.

The mental health status of medical staff influences their professional competence, as well as service quality, career development, and even the maintenance of a harmonious nurse-patient and doctor-patient relationship. For nursing students, there mental health not only affects their daily life and academic performance but also has important implications for future clinical practice. As prospective healthcare providers, maintaining a sound psychological state is essential to safeguarding the physical and mental health of patients. Previous studies have shown that the prevalence of subthreshold depression among Chinese college students is close to 40% [9]. Due to the heavy academic burden and the high pressure of their future professional

environment, the detection rate of subthreshold depression in medical students is as high as 69%, which is much higher than that in the general population [10].

Eastern China is one of the most economically advanced regions in the country, with one of the top levels of educational development. Within this context, this region delivers a substantial amount of higher professional education in nursing and cultivates high-calibre talent. However, vocational education, as a relatively distinctive category of talent development, is characterised by a relatively lower academic positioning, and its graduates often face suboptimal employment outcomes—this issue is particularly prominent in the economically prosperous Yangtze River Delta region of China. Furthermore, vocational school students are in the adolescent stage, a pivotal period marked by encounters with numerous new challenges, role transitions, and developmental tasks [11]. The co-occurrence of critical life events and a relatively insufficient level of social or material resources renders this stage a high-risk window for the onset of mental disorders [12]. In recent years, the mental health status of this student cohort has raised growing concerns, as poor mental health causes adverse impacts on the development and subsequent harnessing of health-related talents. However, no relevant research has yet been documented in the literature.

Against this backdrop, it is imperative to conduct a comprehensive screening for subthreshold depression among nursing students in vocational schools in eastern China. Such an initiative will allow us to identify effective mechanisms of action and develop targeted intervention strategies, thereby enabling early intervention in the target population. Ultimately, our aim is to enhance the mental health of future medical professionals and further improve the overall quality of the workforce in this field.

## 2. Materials and methods

### 2.1. Design

A cross-sectional study was conducted to investigate the prevalence of subthreshold depressive symptoms and their associated factors among nursing students enrolled in medical vocational schools in Eastern China.

This study was reviewed and approved by the Medical Research Ethics Committee of Wuxi Higher Health Vocational Technology School (Approval Number: WXWX [20210908]). All research procedures were implemented in strict accordance with the ethical principles outlined in the Declaration of Helsinki and the regulatory guidelines of relevant governing authorities. Prior to study participation, all subjects were informed of the study details and voluntarily provided written informed consent. Throughout the processes of data collection, statistical analysis, and the reporting of results, strict anonymisation was applied to protect participants' privacy. Additionally, targeted measures were adopted to ensure that no physical, psychological, or social harm inflicted on any research participant.

### 2.2. Participants

**2.2.1. Sample source.** The subjects of this study were nursing students in vocational schools in Eastern China. From March to May 2025, purposive sampling was used to select nursing students from 9 medical vocational schools, and we distributed the “Wenjuanxing” (an online survey platform) link to complete the questionnaire. A total of 1,588 questionnaires were collected, with 1,467 valid responses.

**2.2.2. Inclusion criteria.** The inclusion criteria included the following:

- Chinese nationality;
- Nursing students currently enrolled in vocational schools;
- Informed consent and voluntary participation in this study;
- The respondent completed the questionnaire by themselves or with assistance from the investigator.

**2.2.3. Exclusion criteria.** A total of 1467 valid response questionnaires were collected, and invalid questionnaires were excluded for the following reasons:

- The respondent had been diagnosed with severe mental or physical illness or had limited mobility;
- Questionnaire with missing items;
- Questionnaires showed incorrect answers to  $\geq 2$  of the 3 'trap questions';
- Questionnaires were completed in less than 180s.

## 2.3. Research instruments

The research instruments used in this study were categorised into 3 components. The first investigated the general characteristics of the respondents. The second investigated the depression status of the respondents using the Center for Epidemiological Survey Depression Scale (CES-D). The third comprised a series of other standard scales, including the Family Adaptability and Cohesion Scale-Chinese Version (FACES-II-CV), Dysfunctional Attitude Scale (DAS), Chinese Adolescent Social Support Scale (CASS), 10-item Connor–Davidson Resilience Scale (CD-RISC-10), and Chinese Big Five Personality Inventory brief version (CBF-PI-B). The instruments were used to investigate respondents' family situation, the presence and intensity of dysfunctional attitudes, and their social support status, mental resilience, and personality traits.

**2.3.1. Center for Epidemiological Survey Depression Scale (CES-D).** Depressive symptoms were assessed using the Center for Epidemiological Survey Depression Scale (CES-D) [13], which is by far the most frequently used instrument [14]. The CES-D is a 20-item self-reported questionnaire that evaluates depressive symptoms experienced over the past week (i.e., the recall period is restricted to the preceding 7 days). Comparative analyses with the Hamilton Depression Rating Scale (HAMD) have demonstrated that the CES-D exhibits good validity; thus, it is suitable for application in epidemiological investigations. In this study, the Chinese version of the scale translated by Zhang [15] was adopted. Its reliability and validity had been examined among Chinese adolescents by Chen [16], with a Cronbach's  $\alpha$  coefficient of 0.88 and an average inter-item correlation of 0.26, indicating satisfactory reliability. In large-scale mental health surveys, the CES-D is typically employed as an initial screening instrument: following initial screening, individuals with positive results undergo further diagnostic assessments to confirm potential depressive conditions. According to general research consensus, the CES-D scoring criteria are defined as follows: a score of  $\leq 15$  indicates the absence of depressive symptoms; a score ranging from 16 to 19 suggests the possible presence of depressive symptoms; and a score of  $\geq 20$  denotes the definite presence of depressive symptoms.

In SD studies, two differing approaches are taken to the cut-off value for SD: the most commonly used definition for SD using CES-D is  $\text{CES-D} \geq 16$  [14,17], but sometimes, a  $\text{CES-D} \geq 20$  serves as the initial screening threshold [18]. There is no definitive evidence indicating that one cut-off value is superior to the other. Using the commonly applied cutoff for SD in prior research, participants with a  $\text{CES-D} \geq 16$  were classified as having SD, while those with a  $\text{CES-D} \leq 15$  were classified as the control group in this study.

**2.3.2. Family Adaptability and Cohesion Scale—Chinese Version (FACES II-CV).** The Family Adaptability and Cohesion Scale—Chinese Version (FACES II-CV) consists of 30 items and is divided into 2 dimensions: family cohesion and family adaptability [19,20]. According to the 'arch model' [21], the subject families are divided into 16 family types. Those who are in the middle of the 4 types (i.e., Flexible-Connected, Structured-Connected, Structured-Separated, Flexible-Separated) on the two subscales are balanced, showing a moderate emotional distance between family members, both intimate and independent; that is, they have well-adapted, healthy families. Those who are at the extremes of the 4 types (i.e., Chaotic-Disengaged, Rigid-Disengaged, Chaotic-Enmeshed, Rigid-Enmeshed) on the two subscales show extreme levels of family cohesion and adaptability, that is, the lowest level or the highest level, and these families

and their members often show diametrically opposite characteristics in intimacy and adaptability. The other 8 types (i.e., Flexible-Disengaged, Structured-Disengaged, Chaotic-Separated, Rigid-Separated, Chaotic-Connected, Rigid-Connected, Flexible-Enmeshed, Structured-Enmeshed) are intermediate on one subscale and extreme on the other and are classified as being of an intermediate type.

FACES II is widely used in Western countries. Fei [22] translated the scale into Chinese, revised it three times, and assessed its reliability and validity within Chinese families. The results showed that the scale demonstrated good content validity and internal consistency, and Cronbach's  $\alpha$  coefficients for the two dimensions were 0.67 and 0.72, respectively.

**2.3.3. Dysfunctional Attitude Scale form A (DAS-A).** The Dysfunctional Attitude Scale form A (DAS-A) is a self-report scale designed to measure the presence and intensity of dysfunctional attitudes [23]. The DAS-A consists of 40 items, and each item consists of a statement and a 7-point Likert scale (7 = fully agree; 1 = fully disagree). The total score is the sum of the 40 items, with a range of 40–280. The higher the score, the more dysfunctional attitudes an individual possesses [24]. The 40 items can be divided into eight dimensions: Vulnerability, Perfectionism, Approval and Disapproval, Compulsivity, Dependence, Autonomy Attitudes, Need for Approval, and Cognitive Philosophy. The higher the total score, the more severe the cognitive distortion. Cai [25] brought together clinical psychologists and bilingual linguists from both China and Canada to conduct a series of iterative translations and back-translations of all items, ultimately creating the Chinese version of the Dysfunctional Attitude Scale. This scale underwent pilot testing and validation with Chinese adolescents, yielding a total scale reliability coefficient of 0.88 and a test-retest reliability coefficient of 0.84.

**2.3.4. Chinese Adolescent Social Support Scale (CASS).** The Chinese Adolescent Social Support Scale (CASS) was developed by Ye [26] in 2008. It consists of 17 items, including three dimensions, subjective support, objective support, and support utilisation, and is used to assess the extent to which individuals receive and utilise social resources. This instrument uses a 5-point Likert scale (1 = not applicable, 2 = somewhat not applicable, 3 = indeterminate, 4 = somewhat applicable, and 5 = applicable). The higher the score, the more social support the individual has. According to the total score on the scale, the level of support received is divided into 3 categories: low (total score < 50), medium (50–77), and high (> 77). The internal consistency of the whole scale is 0.907, and the reliability of each subscale is 0.846, 0.806, and 0.838, respectively. The KMO is 0.915, indicating good structural validity. In this study, Cronbach's  $\alpha$  coefficient for this scale was 0.77.

**2.3.5. 10-item Connor–Davidson Resilience Scale (CD-RISC-10).** The Connor-Davidson Resilience Scale (CD-RISC) was developed by Connor and Davidson [27]. Campbell-Sills [28] simplified the scale, resulting in the 10-item CD-RISC-10. Subsequently, Yu [29] translated and culturally adapted this 10-item version into Chinese, establishing the Chinese version of the CD-RISC-10, and validated it in Chinese populations. CD-RISC-10 (Chinese version) scored using a 5-point Likert scale (0 = Never, 1 = Rarely, 2 = Sometimes, 3 = Often, 4 = Always). The scale initially included 5 factors: tenacity, tolerance of negative affect, positive acceptance of change, control, and spiritual beliefs. It includes the 3 dimensions of tenacity, strength, and optimism and has good psychometric properties. This study used a 10-item short version of the Resilience Scale, extracting items 1, 4, 6, 7, 8, 11, 14, 16, 17, and 19 from the original 25 items, with a total score ranging from 0 to 40. Higher scores reflect higher levels of resilience. Cronbach's  $\alpha$  coefficient for this study was 0.942.

**2.3.6. Chinese Big Five Personality Inventory—brief version (CBF-PI-B).** Taking the Big Five model as the theoretical framework and building upon the Big Five Inventory (BFI) developed by John [30], Wang [31,32] compiled a Chinese version of the Big Five Personality Inventory. Through statistical methods, they further selected appropriate items to form a short version, namely the Chinese Big Five Personality Inventory-Brief Version (CBF-PI-B). This inventory consists of 40 items and including five dimensions: CBF-PI-B-Openness, CBF-PI-B-Conscientiousness, CBF-PI-B-Extraversion, CBF-PI-B-Agreeableness, and CBF-PI-B-Neuroticism. Each dimension is measured using 8 items and a 6-point Likert scale (1 = very inconsistent, 2 = relatively inconsistent, 3 = slightly inconsistent, 4 = slightly consistent,

5=relatively consistent, 6=very consistent). The correlation between each factor in the brief version (CBF-PI-B) and the corresponding factor in the full version (CBF-PI) is above 0.85. Cronbach's  $\alpha$  coefficient for the five dimensions of the brief version is above 0.75 [33].

## 2.4. Data analysis

Data entry and analysis were performed using SPSS™ for Windows (version 26.0). Categorical variables were expressed as frequencies (percentages) and compared using the *Chi-squared* test. The Kolmogorov-Smirnov (K-S) test was used to assess the normality of continuous variables. Normally distributed data were presented as mean $\pm$ standard deviation ( $M\pm SD$ ) and compared using independent-samples *t*-test. Non-normally distributed data were presented as median (IQR) and analysed using the Mann-Whitney U test. Based on theoretical rationale, previous evidence regarding the influences of individual, family, and social factors on depression [34–38], we conducted a multivariable analysis of the factors associated with subthreshold depression among the respondents using multivariable binary logistic regression (forced entry method). The results are presented as odds ratios (OR) with 95% confidence intervals (95% CI). To ensure reliable results, we evaluated the internal consistency reliability of the scales used and assessed the potential influence of common method bias using the Harman one-way method. Unless otherwise stated, the level of statistical tests was  $\alpha=0.05$ , and all tests were two-sided.

## 3. Results

### 3.1. Common method variance test

To mitigate potential common method bias, procedural remedies, including anonymous participation and standardized instructions, were implemented during data collection. Subsequently, a Harman's single-factor test was conducted on all items using unrotated exploratory factor analysis. The first factor explained 23.53% of the total variance, which is below the conventional threshold of 40%, indicating the absence of a dominant common factor. While this suggests that common method bias was unlikely to be a serious concern in the present study, it is important to acknowledge that Harman's test provides only a preliminary assessment. Future studies are encouraged to employ more robust methodological approaches to further validate the findings.

### 3.2. Normality test

In this study, the Kolmogorov-Smirnov test ( $P<0.05$ ) revealed that continuous variables exhibited a non-normal distribution. However, visual inspection using quantile-quantile (Q-Q) plots demonstrated that data points were predominantly within a tolerable range around the diagonal line. This finding suggests that, although the data deviated from normality, there was an absence of severe skewness or outliers. In order to enhance the robustness of the findings, results from both parametric (independent-samples *t*-test) and non-parametric (Mann-Whitney U test) tests were reported.

### 3.3. General characteristics and subthreshold depressive status of respondents

A total of 1,589 questionnaires were collected in this study. After screening, 1,467 valid responses remained (92.32%). The effective respondents fell within the 15–20 age range ( $17.5\pm 3.7$ ). The majority of respondents were female, from vocational schools (90.7%). Half of the respondents lived in urban areas. The majority were the only children in their family (53.9%). Respondents' parents were mostly working or self-employed, mainly had a high school education, and were generally married (85.6%). Regarding the FACES-II-CV scale, the majority of this sample were 'mid-range' (42.1%).

Among the 1,467 valid questionnaires, 797 students met the criteria for subthreshold depression, yielding a point prevalence rate of 54.3%. Compared to their non-depressed counterparts, students with subthreshold depression exhibited significant demographic differences: female students demonstrated a significantly higher prevalence rate than male

students ( $\chi^2=8.759$ ,  $P=0.003$ ); prevalence was higher among those whose mothers had attained a lower level of education ( $\chi^2=10.665$ ,  $P=0.005$ ); parental marital status significantly influenced prevalence ( $\chi^2=10.574$ ,  $P=0.005$ ); and significant differences were observed based on family type, with the highest prevalence found in mid-range families ( $\chi^2=58.284$ ,  $P<0.001$ ) (Table 1.).

### 3.4. Analysis of factors contributing to subthreshold depression among vocational nursing students

As shown in Table 2, compared to the control group with a normal level of mental health, SD group exhibited significantly higher scores on the total DAS and all its subscales. Conversely, the SD group demonstrated significantly lower levels of family cohesion and adaptability, social support (including all its subdimensions), and psychological resilience. Regarding personality traits, the SD group scored lower for all factors with the exception of Neuroticism, for which they scored significantly higher. Similar results were obtained using both independent-samples *t*-test and Mann-Whitney U test, and all these differences were statistically significant ( $P<0.001$ ).

Multivariable binary logistic regression analysis was performed to identify independent influencing factors. The overall model was statistically significant (Omnibus test:  $\chi^2=736.295$ ,  $df=33$ ,  $P<0.001$ ). The  $-2$  log-likelihood was 1286.391, and the Nagelkerke  $R^2$  was 0.527. The Hosmer–Lemeshow test indicated excellent model calibration ( $\chi^2=7.461$ ,  $df=8$ ,  $P=0.488$ ). The model demonstrated good discrimination, with an area under the ROC curve (AUC) of 0.875 (95% CI: 0.858–0.893,  $P<0.001$ ) (Fig 1).

Taking subthreshold depression as the dependent variable, a binary logistic regression analysis was performed using the forced-entry method. Independent variables were selected based on theoretical rationale, prior research, and clinical relevance, including sociodemographic characteristics and total scores of each scale, with no variables excluded according to univariate test results. In order to circumvent multicollinearity, only the total score of each scale was included in the regression analysis, while subdomain scores were not entered simultaneously. These variables included respondent's gender, grade, residence, parental occupation, parental educational level, parental marital status, only-child or not, family type, DAS score, family cohesion, family adaptability, social support, resilience, and the five factors in the CBF-PI-B. As shown in Table 3, the results indicated that gender, DAS, Social Support, Resilience and the CBF-PI-B-Neuroticism were retained in the final regression model. In particular, female gender ( $OR=2.862$ , 95% CI= 1.739–4.711,  $P<0.001$ ), DAS ( $OR=1.012$ , 95% CI= 1.005–1.019,  $P<0.01$ ), and CBF-PI-Neuroticism trait ( $OR=1.164$ , 95% CI= 1.134–1.195,  $P<0.001$ ) were independently and positively associated with SD after adjustment for confounders. In contrast, social support ( $OR=0.977$ , 95% CI= 0.963–0.991,  $P<0.01$ ) and resilience ( $OR=0.970$ , 95% CI= 0.944–0.998,  $P<0.05$ ) were independently and negatively associated with SD. All 95% confidence intervals excluded 1, supporting the statistical reliability of these independent associations. These findings extended univariate results and indicated that the above variables were robust and independent correlates of subthreshold depression.

## 4. Discussion

### 4.1. The current status of subthreshold depression among vocational nursing student in eastern China

A growing body of evidence underscores subthreshold depression as a prodromal manifestation of major depression, representing a widespread concern for global mental health. Using a CES-D cut-off score of  $\geq 16$ , the prevalence of subthreshold depression in this study was 54.3%, showing both similarities and differences compared to related research. In 2018, a survey of 600 Jordanian university students by Dalky [39] found that 54.4% of participants reported mental health concerns, including various subthreshold depressive symptoms such as anxiety and stress. Similar trends have been observed in other regions. For instance, surveys conducted in Malaysia also indicated rising levels of depression, anxiety, and stress among college students. Furthermore, a study involving 2691 American college students revealed that more than one third experienced some degree of anxiety or depression during the COVID-19 pandemic [40].

**Table 1. Comparison of subthreshold depression prevalence among 1,467 vocational college nursing students across different characteristics.**

| Variables                          | N(%)        | Non-SD[n(%)] | SD[n(%)]   | $\chi^2$ | P         |
|------------------------------------|-------------|--------------|------------|----------|-----------|
| <b>Total</b>                       | 1467 (100)  | 670 (45.7)   | 797 (54.3) |          |           |
| <b>Gender</b>                      |             |              |            | 8.759    | 0.003**   |
| Male                               | 137 (9.3)   | 79 (11.8)    | 58 (7.3)   |          |           |
| Female                             | 1330 (90.7) | 591 (88.2)   | 739 (92.7) |          |           |
| <b>Grade</b>                       |             |              |            | 7.585    | 0.108     |
| Grade 1                            | 453 (30.9)  | 190 (28.4)   | 263 (33.0) |          |           |
| Grade 2                            | 433 (29.5)  | 210 (30.0)   | 232 (29.1) |          |           |
| Grade 3                            | 329 (22.4)  | 165 (24.6)   | 164 (20.6) |          |           |
| Grade 4                            | 182 (12.4)  | 77 (11.5)    | 105 (13.2) |          |           |
| Grade 5                            | 70 (4.8)    | 37 (5.5)     | 33 (4.1)   |          |           |
| <b>Residence</b>                   |             |              |            | 3.651    | 0.056     |
| Rural                              | 734 (50.0)  | 317 (47.3)   | 417 (52.3) |          |           |
| Urban                              | 733 (50.0)  | 353 (52.7)   | 380 (47.7) |          |           |
| <b>Father's occupation</b>         |             |              |            | 3.043    | 0.385     |
| Public sector workers              | 124 (8.5)   | 53 (7.9)     | 71 (8.9)   |          |           |
| Blue-collar worker                 | 687 (46.8)  | 318 (47.5)   | 369 (46.3) |          |           |
| Self-employed                      | 617 (42.1)  | 286 (42.7)   | 331 (41.5) |          |           |
| Unemployed                         | 39 (2.7)    | 13 (1.9)     | 26 (3.3)   |          |           |
| <b>Mother's occupation</b>         |             |              |            | 2.312    | 0.510     |
| Public sector workers              | 98 (6.7)    | 45 (6.7)     | 53 (6.6)   |          |           |
| Blue-collar worker                 | 720 (49.1)  | 342 (51.0)   | 378 (47.4) |          |           |
| Self-employed                      | 529 (36.1)  | 233 (34.8)   | 296 (37.1) |          |           |
| Unemployed                         | 120 (8.2)   | 50 (7.5)     | 70 (8.8)   |          |           |
| <b>Father's level of education</b> |             |              |            | 4.638    | 0.098     |
| Lower secondary or below           | 552 (37.6)  | 234 (34.9)   | 318 (39.9) |          |           |
| Upper secondary                    | 723 (49.3)  | 350 (52.2)   | 373 (46.8) |          |           |
| Bachelor's degree or higher        | 192 (13.1)  | 86 (12.8)    | 106 (13.3) |          |           |
| <b>Mother's level of education</b> |             |              |            | 10.665   | 0.005**   |
| Lower secondary or below           | 628 (42.8)  | 256 (38.2)   | 372 (46.7) |          |           |
| Upper secondary                    | 690 (47.0)  | 341 (50.9)   | 359 (43.8) |          |           |
| Bachelor's degree or higher        | 149 (10.2)  | 73 (10.9)    | 76 (9.5)   |          |           |
| <b>Only child (yes/no)</b>         |             |              |            | 2.228    | 0.136     |
| Yes                                | 790 (53.9)  | 375 (56.0)   | 415 (52.1) |          |           |
| No                                 | 677 (46.1)  | 295 (44.0)   | 382 (47.9) |          |           |
| <b>Marital status of parents</b>   |             |              |            | 10.574   | 0.005**   |
| Intact family                      | 1256 (85.6) | 589 (87.9)   | 667 (83.7) |          |           |
| Divorced/separated                 | 180 (12.3)  | 75 (11.2)    | 105 (13.2) |          |           |
| Widowed                            | 31 (2.1)    | 6 (0.9)      | 25 (3.1)   |          |           |
| <b>Family type</b>                 |             |              |            | 58.284   | <0.001*** |
| Mid-range                          | 617 (42.1)  | 352 (39.1)   | 355 (44.5) |          |           |
| Flexible–Disengaged                | 0 (0)       | 0 (0)        | 0 (0)      |          |           |
| Structured–Disengaged              | 6 (0.4)     | 4 (0.6)      | 2 (0.3)    |          |           |
| Chaotic–Separated                  | 0 (0)       | 0 (0)        | 0 (0)      |          |           |
| Rigid–Separated                    | 158 (10.8)  | 26 (3.9)     | 132 (16.6) |          |           |
| Chaotic–Connected                  | 3 (0.2)     | 2 (0.3)      | 1 (0.1)    |          |           |

(Continued)

Table 1. (Continued)

| Variables            | N(%)       | Non-SD[n(%)] | SD[n(%)]   | $\chi^2$ | P |
|----------------------|------------|--------------|------------|----------|---|
| Rigid–Connected      | 79 (5.4)   | 30 (4.5)     | 49 (6.1)   |          |   |
| Flexible–Enmeshed    | 284 (19.4) | 162 (24.2)   | 122 (15.3) |          |   |
| Structured–Enmeshed  | 87 (5.9)   | 38 (5.7)     | 49 (6.1)   |          |   |
| Balanced             | 351 (23.9) | 116 (17.3)   | 235 (29.5) |          |   |
| Flexible–Connected   | 148 (10.1) | 47 (7.0)     | 101 (12.7) |          |   |
| Structured–Connected | 148 (10.1) | 50 (7.5)     | 98 (12.3)  |          |   |
| Structured–Separated | 47 (3.2)   | 14 (2.1)     | 33 (4.1)   |          |   |
| Flexible–Separated   | 8 (0.5)    | 5 (0.7)      | 3 (0.4)    |          |   |
| Extreme              | 499 (34.0) | 292 (43.6)   | 207 (26.0) |          |   |
| Chaotic–Disengaged   | 0 (0)      | 0 (0)        | 0 (0)      |          |   |
| Rigid–Disengaged     | 126 (8.6)  | 17 (2.5)     | 109 (13.7) |          |   |
| Chaotic–Enmeshed     | 361 (24.6) | 272 (40.6)   | 89 (11.2)  |          |   |
| Rigid–Enmeshed       | 12 (0.8)   | 3 (0.4)      | 9 (1.1)    |          |   |

\* $P < 0.05$ ; \*\*  $P < 0.01$ ; \*\*\*  $P < 0.001$ .

<https://doi.org/10.1371/journal.pone.0346701.t001>

Table 2. Scale score grading and t-test results of the respondents.

| Variables                  |                      | t-test (M ± SD) |                 |            | Mann-Whitney U [M(IQR)] |            |            |
|----------------------------|----------------------|-----------------|-----------------|------------|-------------------------|------------|------------|
|                            |                      | Non-SD          | SD              | t          | Non-SD                  | SD         | Z          |
| DAS                        | Total Score          | 120.30 ± 24.836 | 147.48 ± 26.869 | -19.978*** | 120.00 (33)             | 147.00(34) | -17.944*** |
|                            | Vulnerability        | 17.32 ± 3.064   | 19.54 ± 3.049   | -13.913*** | 17.00(5)                | 20.00(3)   | -13.385*** |
|                            | Attraction/Repulsion | 15.28 ± 4.591   | 19.35 ± 4.926   | -16.284*** | 15.00(7)                | 19.00(6)   | -14.910*** |
|                            | Perfectionism        | 14.73 ± 4.899   | 17.44 ± 3.679   | -17.417*** | 14.00(7)                | 19.00(6)   | -16.050*** |
|                            | Compulsivity         | 15.76 ± 3.454   | 18.10 ± 3.518   | -12.763*** | 16.00(5)                | 18.00(4)   | -12.247*** |
|                            | Need for Approval    | 12.77 ± 4.312   | 16.56 ± 5.103   | -15.187*** | 13.00(6)                | 16.00(7)   | -13.908*** |
|                            | Dependence           | 14.59 ± 4.342   | 18.24 ± 4.202   | -16.322*** | 15.00(6)                | 18.00(5)   | -15.148*** |
|                            | Autonomous Attitudes | 16.25 ± 5.234   | 20.31 ± 5.409   | -14.560*** | 16.00(7)                | 20.00(7)   | -13.500*** |
|                            | Cognitive Philosophy | 13.60 ± 4.358   | 16.09 ± 4.043   | -11.270*** | 13.00(5)                | 16.00(6)   | -11.632*** |
| Family Cohesion            |                      | 75.97 ± 9.587   | 66.78 ± 10.883  | 17.180***  | 77.00(13)               | 68.00(14)  | -16.270*** |
| Family Adaptability        |                      | 54.75 ± 8.840   | 46.68 ± 9.876   | 16.502***  | 55.00(12)               | 48.00(12)  | -15.370*** |
| Social Support             |                      | 75.88 ± 10.754  | 66.22 ± 12.773  | 15.728***  | 80.00(16)               | 68.00(18)  | -15.516*** |
| Perceived Social Support   |                      | 21.95 ± 3.607   | 18.89 ± 4.291   | 14.845***  | 30.00(4)                | 25.00(7)   | -14.364*** |
| Objective Social Support   |                      | 27.76 ± 3.648   | 24.66 ± 4.837   | 13.974***  | 23.00(5)                | 19.00(6)   | -14.661*** |
| Utilisation of Support     |                      | 26.17 ± 4.463   | 22.67 ± 5.129   | 13.975***  | 28.00(6)                | 24.00(7)   | -13.987*** |
| Resilience                 |                      | 28.80 ± 7.023   | 22.53 ± 6.360   | 17.937***  | 29.00(9)                | 22.00(8)   | -17.062*** |
| CBF-PI-B-Openness          |                      | 36.07 ± 7.471   | 33.64 ± 6.753   | 6.482***   | 36.00(8)                | 33.00(9)   | -6.864***  |
| CBF-PI-B-Conscientiousness |                      | 35.54 ± 6.830   | 31.54 ± 5.848   | 11.921***  | 36.00(9)                | 31.00(7)   | -11.943*** |
| CBF-PI-B-Extraversion      |                      | 32.83 ± 7.011   | 29.65 ± 6.172   | 9.131***   | 33.00(9)                | 30.00(8)   | -9.168***  |
| CBF-PI-B-Agreeableness     |                      | 36.27 ± 6.013   | 33.22 ± 5.611   | 9.972***   | 36.00(8)                | 33.00(7)   | -9.936***  |
| CBF-PI-B-Neuroticism       |                      | 19.88 ± 6.730   | 29.46 ± 6.638   | -27.342*** | 19.00(10)               | 30.00(9)   | -22.764*** |

\*  $P < 0.05$ ; \*\*  $P < 0.01$ ; \*\*\*  $P < 0.001$ .

\* Scores for all variables were obtained from general characteristics, CES-D, FACES-II-CV, DAS, CASS, CD-RISC-10 and CBF-PI-B.

<https://doi.org/10.1371/journal.pone.0346701.t002>

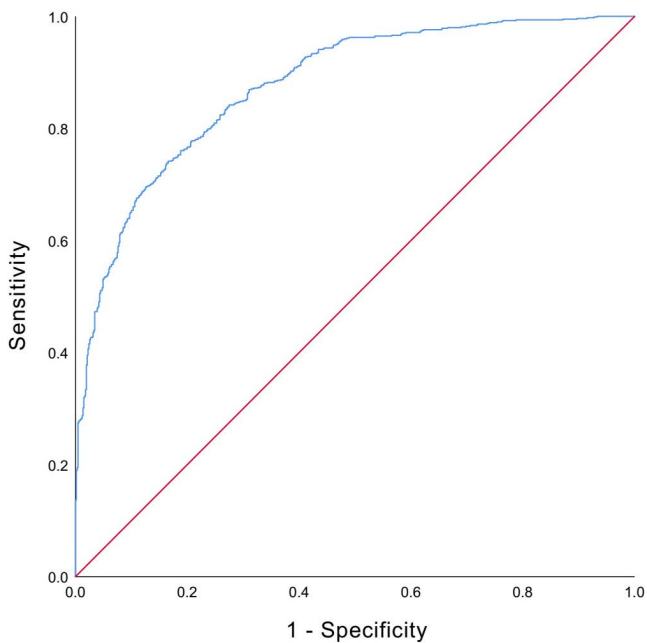

**Fig 1. Receiver operating characteristic (ROC) curve of the multivariable binary logistic regression model.** The model achieved an AUC of 0.875 (95% CI: 0.858-0.893,  $P < 0.001$ ).

<https://doi.org/10.1371/journal.pone.0346701.g001>

Previous studies have documented the prevalence of subthreshold depression among adults and students at comprehensive universities/colleges in China, while research involving vocational school students remains scarce. According to Liao [41], the prevalence of subthreshold depression among adults in primary healthcare settings ranges from 2.9% to 9.9%, whereas community-based studies have reported rates between 1.4% and 17.2%. A subsequent study by Liao [42] conducted in Guangdong Province, China, identified an adult prevalence rate of 14.7%, lower than that observed among vocational students in this investigation. In this study, the prevalence of subthreshold depression among nursing students in vocational education was found to be relatively high. The variations observed in the detection rates of subthreshold depression may be partly attributable to differences in diagnostic criteria. For instance, while some studies use a CES-D score of 20 as the lower threshold for defining subthreshold depression, this study, consistent with the majority of the existing literature, adopts a cut-off score of 16 [14]. On the other hand, the differences may also be related to the characteristics of the sampled population. Vocational school students are typically in a transitional phase from adolescence to early adulthood. Research indicates that the prevalence of subthreshold depression increases significantly after the age of 12 and peaks during adolescence, between ages 14 and 16 [43]. Students in this group are in the late adolescent stage, during which both physical and psychological development are progressing from immaturity to maturity, while the nervous system remains relatively unstable. Furthermore, nursing students face a heavy academic burden, and the unique nature of their discipline exposes them to complex nurse–patient relationships, medical disputes, occupational injuries, and other challenges. Academic pressure combined with unknown associated factors may lead to an increase in negative emotions. When external stressors exceed their psychological coping capacity, they may be prone to extreme reactions. Within an exam-orientated education system, most schools neglect mental health education. As a result, students often lack effective strategies for managing intense emotions, which can lead to a range of mental health issues. Furthermore, compared to junior high or general high school students, vocational students are usually required to live on campus, away from their parents. The collective living environment can be difficult for many to adapt to, and conflicts

**Table 3. Multivariable binary logistic regression results for factors associated with subthreshold depression among vocational nursing students in eastern China.**

| Variable                                                    | B      | SE (B) | Wald $\chi^2$ | P         | OR    | 95% CI |       |
|-------------------------------------------------------------|--------|--------|---------------|-----------|-------|--------|-------|
|                                                             |        |        |               |           |       | Lower  | Upper |
| Gender (Ref: Male)                                          |        |        |               |           |       |        |       |
| Female                                                      | 1.052  | 0.254  | 17.113        | <0.001*** | 2.862 | 1.739  | 4.711 |
| Grade (Ref: Grade 1)                                        |        |        |               |           |       |        |       |
| Grade 2                                                     | 0.014  | 0.183  | 0.005         | 0.941     | 1.014 | 0.708  | 1.452 |
| Grade 3                                                     | -0.166 | 0.194  | 0.731         | 0.393     | 0.847 | 0.579  | 1.239 |
| Grade 4                                                     | 0.270  | 0.242  | 1.241         | 0.265     | 1.309 | 0.815  | 2.104 |
| Grade 5                                                     | 0.328  | 0.351  | 0.873         | 0.350     | 1.388 | 0.698  | 2.763 |
| Residence (Ref: Rural)                                      |        |        |               |           |       |        |       |
| Urban                                                       | -0.100 | 0.154  | 0.426         | 0.514     | 0.905 | 0.669  | 1.223 |
| Father's occupation (Ref: Public sector workers)            |        |        |               |           |       |        |       |
| Blue-collar worker                                          | -0.252 | 0.329  | 0.585         | 0.445     | 0.777 | 0.408  | 1.482 |
| Self-employed                                               | -0.342 | 0.327  | 1.094         | 0.296     | 0.710 | 0.374  | 1.349 |
| Unemployed                                                  | 0.253  | 0.590  | 0.183         | 0.668     | 1.287 | 0.405  | 4.091 |
| Mother's occupation (Ref: Public sector workers)            |        |        |               |           |       |        |       |
| Blue-collar worker                                          | 0.023  | 0.352  | 0.004         | 0.948     | 1.023 | 0.514  | 2.038 |
| Self-employed                                               | 0.157  | 0.353  | 0.196         | 0.658     | 1.169 | 0.585  | 2.337 |
| Unemployed                                                  | -0.288 | 0.422  | 0.468         | 0.494     | 0.750 | 0.328  | 1.713 |
| Father's level of education (Ref: Lower secondary or below) |        |        |               |           |       |        |       |
| Upper secondary                                             | 0.013  | 0.179  | 0.005         | 0.944     | 1.013 | 0.713  | 1.439 |
| Bachelor's degree or higher                                 | 0.258  | 0.277  | 0.869         | 0.351     | 1.294 | 0.752  | 2.227 |
| Mother's level of education (Ref: Lower secondary or below) |        |        |               |           |       |        |       |
| Upper secondary                                             | -0.142 | 0.174  | 0.671         | 0.413     | 0.867 | 0.617  | 1.219 |
| Bachelor's degree or higher                                 | -0.216 | 0.294  | 0.538         | 0.463     | 0.806 | 0.453  | 1.434 |
| Only child (yes/no) (Ref: yes)                              |        |        |               |           |       |        |       |
| No                                                          | 0.115  | 0.150  | 0.591         | 0.442     | 1.122 | 0.836  | 1.506 |
| Marital status of parents (Ref: Intact family)              |        |        |               |           |       |        |       |
| Divorced/separated                                          | 0.110  | 0.220  | 0.251         | 0.616     | 1.116 | 0.726  | 1.717 |
| Widowed                                                     | 0.832  | 0.598  | 1.932         | 0.165     | 2.297 | 0.711  | 7.423 |
| Family type (Ref: Mid-range)                                |        |        |               |           |       |        |       |
| Balanced                                                    | 0.331  | 0.193  | 2.958         | 0.085     | 1.393 | 0.955  | 2.031 |
| Extreme                                                     | -0.308 | 0.187  | 2.716         | 0.099     | 0.735 | 0.509  | 1.060 |
| DAS                                                         | 0.012  | 0.004  | 11.413        | 0.001**   | 1.012 | 1.005  | 1.019 |
| Family Cohesion                                             | -0.015 | 0.015  | 0.975         | 0.323     | 0.985 | 0.956  | 1.015 |
| Family Adaptability                                         | -0.010 | 0.017  | 0.371         | 0.543     | 0.990 | 0.958  | 1.023 |
| Social Support                                              | -0.023 | 0.007  | 9.917         | 0.002**   | 0.977 | 0.963  | 0.991 |
| Resilience                                                  | -0.030 | 0.014  | 4.514         | 0.034*    | 0.970 | 0.944  | 0.998 |
| CBF-PI-B-Openness                                           | 0.014  | 0.013  | 1.217         | 0.270     | 1.014 | 0.989  | 1.041 |
| CBF-PI-B-Conscientiousness                                  | -0.003 | 0.014  | 0.045         | 0.832     | 0.997 | 0.969  | 1.026 |
| CBF-PI-B-Extraversion                                       | -0.004 | 0.013  | 0.078         | 0.780     | 0.996 | 0.971  | 1.023 |
| CBF-PI-B-Agreeableness                                      | -0.018 | 0.015  | 1.416         | 0.234     | 0.983 | 0.954  | 1.011 |
| CBF-PI-B-Neuroticism                                        | 0.152  | 0.03   | 127.851       | <0.001*** | 1.164 | 1.134  | 1.195 |
| Constant                                                    | -1.585 | 1.081  | 2.148         | 0.143     | 0.205 |        |       |

\*  $P < 0.05$ ; \*\*  $P < 0.01$ ; \*\*\*  $P < 0.001$ .

<https://doi.org/10.1371/journal.pone.0346701.t003>

may arise due to differences in lifestyle habits, leading to interpersonal difficulties and an increased susceptibility to depressive tendencies.

## 4.2. Differences between vocational nursing students with and without subthreshold depression

**4.2.1. Comparison of general demographic characteristics.** A comparison was made between individuals with subthreshold depression and those without, using chi-squared tests and t-tests to determine significant differences. The findings of the chi-squared test demonstrated significant disparities between the two groups with regard to gender, maternal level of educational attainment, parental marital status, and family type. The incidence of subthreshold depression was found to be significantly higher among female students than among their male counterparts. This finding is consistent with the results of previous studies [44,45]. The observed disparity may be attributed to women having greater susceptibility to emotionally triggering external factors, as well as the broader societal expectations placed on them, which contribute to increased academic and employment pressures. However, given the preponderance of women within the nursing profession, the possibility of sampling bias cannot be discounted. Further studies are required to validate these findings.

**4.2.2. Comparison of family functioning-related indicators.** This study found that students whose mothers had attained a higher level of education were less likely to experience subthreshold depression. However, no significant association was observed between fathers' educational level and subthreshold depression. This pattern may be closely related to mothers' familial roles, parenting approaches, and mental health awareness. Within the context of traditional Chinese social culture, the responsibility for child-rearing is shouldered by mothers in many households. Individuals with higher levels of education have been shown to have greater awareness of mental health issues, which may result in enhanced ability to recognise emotional distress in their children and provide timely and appropriate support. However, this does not imply that the role of the father is unimportant. A father's level of education can indirectly affect his children via their mother. Consequently, it is necessary for both parents to pay close attention to their children's mental health status and to assist in reducing negative emotions. Contrary to the findings of previous studies, our research demonstrated a higher prevalence of subthreshold depression among students from families characterised by harmonious parental marital relationships. This phenomenon may be attributed to the fact that families with stable marriages often have higher expectations for their children. Consequently, children who are influenced by this type of family atmosphere tend to pursue perfection, thereby experiencing greater academic or behavioural pressure. Additionally, children from families with harmonious marriages may have less exposure to adversity, rendering them more vulnerable to depressive emotions when facing difficulties [46]. Therefore, it is essential for parents to be attentive to their children's emotional needs and to assist them in coping with stress. Based on our study, we hypothesise that family type exerts a certain influence on subthreshold depression (SD) among vocational nursing students. The SD group was primarily characterised by mid-range family types (44.5%). As demonstrated in Table 2, the levels of family cohesion and adaptability exhibited by students in the SD group were found to be significantly lower in comparison to those observed in the normal group. In accordance with the principles outlined by Olson's [21] Circumplex Model of Marital and Family Systems, mid-range family typologies are distinguished by an imbalance between cohesion and adaptability. This implies that one dimension remains within the standard range, while the other exhibits an excessively high or low value, thereby signifying impairments in specific domains of family functionality. Subsequent analysis indicated that the three most prevalent family subtypes among nursing students with SD were Rigid-Separated (16.6%), Flexible-Enmeshed (15.3%), and Rigid-Disengaged (13.7%). Among these, extreme family types demonstrated the poorest overall functioning. The findings of this study indicate that within the SD group, family relationships are characterised by emotional independence, accompanied by the maintenance of appropriate boundaries. However, certain students demonstrated an excessive detachment from, or over-dependence on, their parents, reflecting either weak or highly entangled emotional connections. The transition of late adolescents towards independence is accompanied by a psychological shift that marks a departure from the authority

of their parents. This process is frequently referred to as psychological ‘weaning’. This dynamic can result in reduced communication with parents, resistance against parental authority, and, in the most severe cases, emotional distancing. These developmental shifts frequently result in a reduction in familial cohesion. Conversely, some families exhibit a lack of clearly delineated personal boundaries, resulting in elevated levels of emotional and behavioural enmeshment, over-reliance on one another, and difficulties in independent decision-making or problem-solving.

Furthermore, families in the SD group demonstrated significantly lower levels of cohesion and adaptability, which resulted in impaired communication, emotional alienation, inflexible family roles, and an inability to adjust effectively to developmental changes or external stressors. These factors collectively compromise overall family functioning. In comparison to their counterparts enrolled at universities, vocational students generally encounter reduced academic pressure and more leisure time. However, it is important to note that many individuals become excessively engaged in online games, which has the potential to place further strain on family relationships. Some studies have indicated that internet addiction has the potential to reduce parent–child communication and shared daily experiences, which can result in family conflict resolution becoming more challenging [47]. This behaviour has been linked to delayed psychosocial maturation due to prolonged exposure to virtual environments. This may also contribute to the development of subthreshold depression in this population. The enhancement of family cohesion and adaptability has been demonstrated to be a means of reducing depressive symptoms and promoting physical health among adolescent students [35,36].

**4.2.3. Comparison of DAS, social support, resilience, and personality traits between the two groups.** As demonstrated in [Table 2](#), the DAS score of nursing students in the SD group was found to be significantly higher than that in the non-SD group. Furthermore, nursing students who exhibited elevated levels of depressive symptoms also demonstrated a higher level of dysfunctional attitudes, a finding that is consistent with the results of previous studies. Dysfunctional attitudes have been observed to manifest with notable stability within the cognitive structure of adolescents. In the event of adverse life experiences, such as those previously outlined, the potential for the onset of dysfunctional attitudes in adolescents is increased. This can result in a tendency to interpret external information in a negative and distorted manner. This, in turn, gives rise to a series of depressive symptoms or emotions.

Additionally, the levels of social support and resilience were significantly lower in the SD group than in the control group. Numerous studies have demonstrated that a low level of social support is closely associated with an increased risk of depression. In circumstances where social support is inadequate, individuals may experience feelings of isolation and helplessness and find themselves lacking the necessary resources to cope with stress and adversity. This, in turn, can increase their vulnerability to depressive symptoms. Resilience has been identified as a critical protective factor for individuals’ mental health, as it has been demonstrated to serve as a buffer against the adverse effects of challenging circumstances. In line with the findings of earlier research, this study demonstrates a negative correlation between resilience and emotional disorders. Vocational nursing students constitute a relatively distinctive student group. Faced with demanding academic workloads, relatively low levels of academic achievement, high employment pressure, and the imminent responsibility of engaging in patient care and life-saving tasks, these students often experience a sustained high-pressure environment. Consequently, they demonstrate a heightened vulnerability to depressive symptomatology in comparison to the general population.

Regarding personality traits, the SD group demonstrated lower scores in comparison to the non-SD group across all factors, with the exception of the neuroticism dimension of the CBF-PI-B. Individuals who score higher for the neuroticism factor tend to be more susceptible to negative emotions such as anxiety and depression.

**4.2.4. Related factors in subthreshold depression among vocational nursing students in eastern China.** Multivariable binary logistic regression was employed in this study to analyse the associations between respondents’ demographic characteristics, scale scores, and the associated factors of subthreshold depression. Independent associations were further quantified using odds ratios (ORs) and 95% confidence intervals (CIs). Notably, all 95% CIs for these ORs excluded the null value of 1, reinforcing the statistical stability and reliability of these independent

effects. Regression analysis revealed that subthreshold depression in nursing students in vocational schools is closely associated with gender, dysfunctional attitudes, CBF-PI-B-Neuroticism trait, social support and resilience. Compared with males, females have a significantly higher odds of depression. This phenomenon can be partly attributed to women's tendency to exhibit heightened emotional intensity and sensitivity [48]. In line with this gender-related pattern, research has shown that female vocational nursing students are more likely to experience depression than their male counterparts. This phenomenon has been attributed to various factors, such as academic performance, physical appearance, lifestyle habits, and cumulative pressure from academic and daily life [49]. Further studies have indicated that this gender discrepancy also applies to subthreshold depression, with female students demonstrating a higher tendency toward this condition than their male counterparts. Therefore, teachers and parents should pay more attention to female students. Psychological counselling and other approaches can alleviate psychological pressure, provide timely assistance in resolving difficulties, and identify subthreshold depressive tendencies early on. Effective intervention should be implemented promptly for students exhibiting subthreshold depression. Dysfunctional attitudes were independently and significantly positive associated with SD. According to Beck's cognitive model of depression, depressive symptoms can be promoted by dysfunctional attitudes when triggered by stressful life events [50]. There is ample evidence that the content of dysfunctional thinking is associated with vulnerability to major depression [51,52]. This study confirmed that, as a high-risk population for MDD, individuals with subthreshold depression exhibited a significant positive correlation between dysfunctional attitudes and subthreshold depression. Therefore, greater attention should be paid to the population with psychological subhealth, especially adolescents in the critical period of cognitive development. Structured cognitive interventions should be conducted among this group to improve their cognitive regulation ability, thereby preventing the pathological transition from subthreshold depression to MDD. Among the various personality trait dimensions, the CBF-PI-B-Neuroticism factor significantly influences the occurrence of subthreshold depression in nursing students. Those with high neuroticism scores experience negative emotions such as anxiety and depression more readily. They also exhibit heightened sensitivity to stress and emotional stimuli, display greater emotional volatility, and are more prone to negative emotional states. Concurrently, research indicates that neuroticism may be associated with functional abnormalities in certain neurotransmitters (such as serotonin), which are closely linked to the development of depression.

Furthermore, regression analysis showed that after controlling for potential confounding variables, social support and resilience both entered the regression equation and were independently and negatively associated with subthreshold depression. These findings extend the correlational results obtained in the previous comparative analysis and confirm that social support and resilience may serve as potential protective factors against subthreshold depressive symptoms, rather than merely reflecting group differences. The independent predictive roles of these two factors suggest that interventions targeting the enhancement of social support resources and the improvement of psychological resilience may effectively reduce the risk of subthreshold depression among vocational nursing students. Taken together, these results highlight the importance of integrating both external supportive resources and internal psychological capacities into preventive strategies for subthreshold depression in this high-risk population.

The factors influencing subthreshold depression among vocational college nursing students are multifaceted and complex. While earlier studies suggested that factors such as place of birth, academic year, and being an only child may impact subthreshold depression, this study found these to be non-significant. The regression equation revealed that gender and neuroticism were the only significant factors. This discrepancy may be attributed to the geographical location of the survey population and the particular educational levels involved. Further validation of the potential for sampling bias is required.

## 5. Conclusions

The main findings of this study can be summarised as follows. Firstly, the prevalence rate of subthreshold depression among nursing students in this study was found to be 54.3%, indicating a higher incidence compared to other groups.

Secondly, factors associated with the subthreshold depression among Chinese vocational nursing students were identified, including demographic characteristics, basic family information, level of family functioning, dysfunctional attitudes, social support, resilience, and personality traits. Students exhibiting subthreshold depression demonstrate relatively unhealthy cognitive attitudes and heightened emotional sensitivity and instability, as well as lower levels of family functioning, social support, and psychological resilience. The results show that being female, scoring highly for dysfunctional attitudes and CBF-PI-B-Neuroticism, insufficient social support, and low psychological resilience are associated factors for the prevalence of subthreshold depression among Chinese vocational nursing students. This study suggests that various entities, including the state, community, hospitals, college, and family, should create and share resources and develop programmes to improve the mental health of Chinese vocational nursing students.

## Acknowledgments

The authors wish to extend their gratitude to all participants in this study for their cooperation and to all relevant personnel at nursing vocational colleges for their assistance in data collection.

## Author contributions

**Conceptualization:** Ruoying Cheng, Wei Zhu.

**Data curation:** Zijuan Yang.

**Formal analysis:** Zijuan Yang.

**Funding acquisition:** Ruoying Cheng.

**Investigation:** Ruoying Cheng, Zijuan Yang.

**Methodology:** Shuyu Jiang.

**Project administration:** Ruoying Cheng.

**Supervision:** Ruoying Cheng, Wei Zhu.

**Validation:** Shuyu Jiang.

**Writing – original draft:** Ruoying Cheng.

**Writing – review & editing:** Ruoying Cheng, Wei Zhu.

## References

- Balázs J, Miklósi M, Keresztény A, Hoven CW, Carli V, Wasserman C, et al. Adolescent subthreshold-depression and anxiety: psychopathology, functional impairment and increased suicide risk. *J Child Psychol Psychiatry*. 2013;54(6):670–7. <https://doi.org/10.1111/jcpp.12016> PMID: [23330982](https://pubmed.ncbi.nlm.nih.gov/23330982/)
- Li H, Luo X, Ke X, Dai Q, Zheng W, Zhang C, et al. Major depressive disorder and suicide risk among adult outpatients at several general hospitals in a Chinese Han population. *PLoS One*. 2017;12(10):e0186143. <https://doi.org/10.1371/journal.pone.0186143> PMID: [29016669](https://pubmed.ncbi.nlm.nih.gov/29016669/)
- Park S, Hatim Sulaiman A, Srisurapanont M, Chang S, Liu C-Y, Bautista D, et al. The association of suicide risk with negative life events and social support according to gender in Asian patients with major depressive disorder. *Psychiatry Res*. 2015;228(3):277–82. <https://doi.org/10.1016/j.psychres.2015.06.032> PMID: [26160206](https://pubmed.ncbi.nlm.nih.gov/26160206/)
- Lee YY, Stockings EA, Harris MG, Doi SAR, Page IS, Davidson SK, et al. The risk of developing major depression among individuals with subthreshold depression: a systematic review and meta-analysis of longitudinal cohort studies. *Psychol Med*. 2019;49(1):92–102. <https://doi.org/10.1017/S0033291718000557> PMID: [29530112](https://pubmed.ncbi.nlm.nih.gov/29530112/)
- Jiang L, Zhang S, Wang Y, So K-F, Ren C, Tao Q. Efficacy of light therapy for a college student sample with non-seasonal subthreshold depression: An RCT study. *J Affect Disord*. 2020;277:443–9. <https://doi.org/10.1016/j.jad.2020.08.055> PMID: [32871530](https://pubmed.ncbi.nlm.nih.gov/32871530/)
- Bertha EA, Balázs J. Subthreshold depression in adolescence: a systematic review. *Eur Child Adolesc Psychiatry*. 2013;22(10):589–603. <https://doi.org/10.1007/s00787-013-0411-0> PMID: [23579389](https://pubmed.ncbi.nlm.nih.gov/23579389/)
- Carrellas NW, Biederman J, Uchida M. How prevalent and morbid are subthreshold manifestations of major depression in adolescents? A literature review. *J Affect Disord*. 2017;210:166–73. <https://doi.org/10.1016/j.jad.2016.12.037> PMID: [28049101](https://pubmed.ncbi.nlm.nih.gov/28049101/)

8. Kroenke K. When and How to Treat Subthreshold Depression. *JAMA*. 2017;317(7):702–4. <https://doi.org/10.1001/jama.2017.0233> PMID: [28241337](https://pubmed.ncbi.nlm.nih.gov/28241337/)
9. Ge P, Tan C, Liu J-X, Cai Q, Zhao S-Q, Hong W-Y, et al. Prevalence of subthreshold depression and its related factors in Chinese college students: A cross-sectional study. *Heliyon*. 2024;10(12):e32595. <https://doi.org/10.1016/j.heliyon.2024.e32595> PMID: [38988518](https://pubmed.ncbi.nlm.nih.gov/38988518/)
10. Zhang YCZ. Factors influence of subthreshold depression in medical college students. Beijing, China: Beijing University of Chinese Medicine; 2020.
11. Brown BB. Adolescents' relationships with peers. In: Lerner RM, Steinberg L (Eds.). *Handbook of adolescent psychology* (2nd ed.). John Wiley & Sons; 2004. p. 363–94. <https://doi.org/10.1002%2F9780471726746.ch12>
12. Larson ER, Chaku N, Moussa-Tooks A. Early Pubertal Development Is a Risk Factor for Psychotic-Like Experiences in Boys and Girls. *Biol Psychiatry Glob Open Sci*. 2025;6(2):100647. <https://doi.org/10.1016/j.bpsgos.2025.100647> PMID: [41542154](https://pubmed.ncbi.nlm.nih.gov/41542154/)
13. Shima S, Shikano T, Kitamura T, Asai M. New self-rating scales for depression. *Clin Psychiat*. 1985;27:717–23.
14. Volz H-P, Stirnweiß J, Kasper S, Möller H-J, Seifritz E. Subthreshold depression - concept, operationalisation and epidemiological data. A scoping review. *Int J Psychiatry Clin Pract*. 2023;27(1):92–106. <https://doi.org/10.1080/13651501.2022.2087530> PMID: [35736807](https://pubmed.ncbi.nlm.nih.gov/35736807/)
15. Zhang MY. *Manual of psychiatric rating scales*. China: Hunan Science and Technology Press; 1998.
16. Chen ZY, Yang XD, Li XY. Psychometric features of CES-D in Chinese adolescents. *Chinese Journal of Clinical Psychology*. 2009;17(4):443–5. <https://doi.org/10.16128/j.cnki.1005-3611.2009.04.027>
17. Buntrock C, Ebert D, Lehr D, Riper H, Smit F, Cuijpers P, et al. Effectiveness of a web-based cognitive behavioural intervention for subthreshold depression: pragmatic randomised controlled trial. *Psychother Psychosom*. 2015;84(6):348–58. <https://doi.org/10.1159/000438673> PMID: [26398885](https://pubmed.ncbi.nlm.nih.gov/26398885/)
18. Stice E, Rohde P, Gau JM, Wade E. Efficacy trial of a brief cognitive-behavioral depression prevention program for high-risk adolescents: effects at 1- and 2-year follow-up. *J Consult Clin Psychol*. 2010;78(6):856–67. <https://doi.org/10.1037/a0020544> PMID: [20873893](https://pubmed.ncbi.nlm.nih.gov/20873893/)
19. Olson DH, Portner J, Bell R. FACES II: Family Adaptability and Cohesion Evaluation Scales. In: Olson DH, McCubbin H, Barnes H, Larsen A, Muxen M, Wilson M, editors. *Family Inventories*. St. Paul: University of Minnesota; 1982. p. 5–24.
20. Phillips MR, West CL, Shen Q, Zheng Y. Comparison of schizophrenic patients' families and normal families in China, using Chinese versions of FACES-II and the Family Environment Scales. *Fam Process*. 1998;37(1):95–106. <https://doi.org/10.1111/j.1545-5300.1998.00095.x> PMID: [9589284](https://pubmed.ncbi.nlm.nih.gov/9589284/)
21. Olson DH, Russell CS, Sprenkle DH. Circumplex model of marital and family systems: VI. theoretical update. *Family Process*. 1983;22:69–83. <https://doi.org/10.1111/j.1545-5300.1983.00069.x>
22. Fei LP, Shen QJ, Zheng YP, Zhao JP, Jiang SA, Wang LW. Preliminary evaluation of the "Family Adaptability and Cohesion Scale" and "Family Environment Scale" - a controlled study between normal families and families of schizophrenia patients. *Chin Ment Health J*. 1991;5:198–202, 238.
23. Weissman AN. *The Dysfunctional Attitude Scale: A Validation Study*. Ph.D. Thesis, University of Pennsylvania, Philadelphia, Pennsylvania, USA, 1979. Available from: <https://www.proquest.com/openview/4c74cab5ed1c50f954e5cdd53757de4/1?pq-origsite=gscholar&cbl=18750&diss=y>
24. Weissman A, Beck A. Development and Validation of the Dysfunctional Attitude Scale (DAS), ERIC: Education Resources Information Center. USA. [Cited 2025 Sep 02]. Available from: <https://coilink.org/20.500.12592/3sez69j>
25. Cai L, Zhu XZ, Peng SF, Zhong MJ, Zhang S. Application of Chinese Version of the Dysfunctional Attitude Scale in a Sample of Chinese Adolescents. *Chinese Journal of Clinical Psychology*. 2010;18(2):161–4. <https://doi.org/10.16128/j.cnki.1005-3611.2010.02.021>
26. Ye YM, Dai XY. Development of social support scale for university students. *Chin J Clin Psychol*. 2008;5:456–8. <https://doi.org/10.16128/j.cnki.1005-3611.2008.05.019>
27. Connor KM, Davidson JRT. Development of a new resilience scale: the Connor-Davidson Resilience Scale (CD-RISC). *Depress Anxiety*. 2003;18(2):76–82. <https://doi.org/10.1002/da.10113> PMID: [12964174](https://pubmed.ncbi.nlm.nih.gov/12964174/)
28. Campbell-Sills L, Stein MB. Psychometric analysis and refinement of the Connor-davidson Resilience Scale (CD-RISC): Validation of a 10-item measure of resilience. *J Trauma Stress*. 2007;20(6):1019–28. <https://doi.org/10.1002/jts.20271> PMID: [18157881](https://pubmed.ncbi.nlm.nih.gov/18157881/)
29. Yu XN, Zhang JX. Factor analysis and psychometric evaluation of the Connor-Davidson resilience scale (CD-RISC) with Chinese people. *Social Behavior and Personality: An international journal*. 2007;35(1):19–30. <https://doi.org/10.2224/sbp.2007.35.1.19>
30. John OP, Robins RW, Pervin LA. Paradigm shift to the integrative big five trait taxonomy: History, measurement, and conceptual issues. *Handbook of Personality: Theory and Research*. New York: The Guilford Press; 2008. p. 114–58.
31. Wang MC, Dai XY, Yao SQ. Development of Chinese Big Five Personality Inventory (CBF-PI) I: Theoretical Framework and Reliability Analysis. *Chin J Clin Psychol*. 2010;18(05):545–8. <https://doi.org/10.16128/j.cnki.1005-3611.2010.05.012>
32. Wang MC, Dai XY, Yao SQ. Development of the Chinese Big Five Personality Inventory (CBF-PI) II: Validity analysis. *Chin J Clin Psychol*. 2010;18(06):687–90. <https://doi.org/10.16128/j.cnki.1005-3611.2010.06.030>
33. Wang MC, Dai XY, Yao SQ. Development of the Chinese Big Five Personality Inventory (CBF-PI) III: Psychometric properties of CBF-PI brief version. *Chin J Clin Psychol*. 2011;19(04):454–7. <https://doi.org/10.16128/j.cnki.1005-3611.2011.04.004>
34. Ju Y, Wang M, Lu X, Sun J, Dong Q, Zhang L, et al. The effects of childhood trauma on the onset, severity and improvement of depression: The role of dysfunctional attitudes and cortisol levels. *J Affect Disord*. 2020;276:402–10. <https://doi.org/10.1016/j.jad.2020.07.023> PMID: [32871670](https://pubmed.ncbi.nlm.nih.gov/32871670/)

35. Huang X, Hu N, Yao Z, Peng B. Family functioning and adolescent depression: A moderated mediation model of self-esteem and peer relationships. *Front Psychol.* 2022;13:962147. <https://doi.org/10.3389/fpsyg.2022.962147> PMID: 36017432
36. Nabayinda J, Kizito S, Ssentumbwe V, Namatovu P, Sensoy Bahar O, Damulira C, et al. The Relationship Between Family Cohesion and Depression Among School-Going Children With Elevated Symptoms of Behavioral Challenges in Southern Uganda. *J Adolesc Health.* 2023;72(5S):S11–7. <https://doi.org/10.1016/j.jadohealth.2022.12.016> PMID: 37062578
37. Thoits PA. Mechanisms linking social ties and support to physical and mental health. *J Health Soc Behav.* 2011;52(2):145–61. <https://doi.org/10.1177/0022146510395592> PMID: 21673143
38. Ho CSH, Chua J, Tay GWN. The diagnostic and predictive potential of personality traits and coping styles in major depressive disorder. *BMC Psychiatry.* 2022;22(1):301. <https://doi.org/10.1186/s12888-022-03942-y> PMID: 35484526
39. Dalky HF, Gharaibeh A. Depression, anxiety, and stress among college students in Jordan and their need for mental health services. *Nurs Forum.* 2019;54(2):205–12. <https://doi.org/10.1111/nuf.12316> PMID: 30554406
40. Lee J, Jeong HJ, Kim S. Stress, Anxiety, and Depression Among Undergraduate Students during the COVID-19 Pandemic and their Use of Mental Health Services. *Innov High Educ.* 2021;46(5):519–38. <https://doi.org/10.1007/s10755-021-09552-y> PMID: 33907351
41. Liao Y, Zhang H, Guo L, Fan B, Wang W, Teopiz KM, et al. Impact of cognitive-affective and somatic symptoms in subthreshold depression transition in adults: Evidence from Depression Cohort in China (DCC). *J Affect Disord.* 2022;315:274–81. <https://doi.org/10.1016/j.jad.2022.08.009> PMID: 35952931
42. Liao D-D, Dong M, Ding K-R, Hou C-L, Tan W-Y, Ke Y-F, et al. Prevalence and patterns of major depressive disorder and subthreshold depressive symptoms in south China. *J Affect Disord.* 2023;329:131–40. <https://doi.org/10.1016/j.jad.2023.02.069> PMID: 36828143
43. Rohde P, Beevers CG, Stice E, O'Neil K. Major and minor depression in female adolescents: onset, course, symptom presentation, and demographic associations. *J Clin Psychol.* 2009;65(12):1339–49. <https://doi.org/10.1002/jclp.20629> PMID: 19827116
44. Judd LL, Akiskal HS, Paulus MP. The role and clinical significance of subsyndromal depressive symptoms (SSD) in unipolar major depressive disorder. *J Affect Disord.* 1997;45(1–2):5–17; discussion 17–8. [https://doi.org/10.1016/s0165-0327\(97\)00055-4](https://doi.org/10.1016/s0165-0327(97)00055-4) PMID: 9268771
45. Rodríguez MR, Nuevo R, Chatterji S, Ayuso-Mateos JL. Definitions and factors associated with subthreshold depressive conditions: a systematic review. *BMC Psychiatry.* 2012;12:181. <https://doi.org/10.1186/1471-244X-12-181> PMID: 23110575
46. Zhang J. A comparison of family environment and parental rearing styles among college students with different depressive status. *Journal of South China Normal University (Social Science Edition).* 2015;5:64–9.
47. Alavi M, Latif AA, Ninggal MT, Mustafa MS, Amini M. Family Functioning and Attachment Among Young Adults in Western and Non-Western Societies. *J Psychol.* 2020;154(5):346–66. <https://doi.org/10.1080/00223980.2020.1754153> PMID: 32394798
48. Shi J, Han X, Liao Y, Zhao H, Fan B, Zhang H, et al. Associations of stressful life events with subthreshold depressive symptoms and major depressive disorder: The moderating role of gender. *J Affect Disord.* 2023;325:588–95. <https://doi.org/10.1016/j.jad.2023.01.050> PMID: 36657495
49. Graves BS, Hall ME, Dias-Karch C, Haischer MH, Apter C. Gender differences in perceived stress and coping among college students. *PLoS One.* 2021;16(8):e0255634. <https://doi.org/10.1371/journal.pone.0255634> PMID: 34383790
50. Beck AT. Cognitive therapy of depression: new perspectives. In: Clayton PJ, Barrett JE, editors. *Treatment of depression: old controversies and new approaches.* New York: Raven Press; 1983. p. 265–90.
51. Olinger LJ, Kuiper NA, Shaw BF. Dysfunctional attitudes and stressful life events: an interactive model of depression. *Cogn Ther Res.* 1987;11:25–40. <https://doi.org/10.1007/BF01183130>
52. Ingram RE, Miranda J, Segal ZV. *Cognitive vulnerability to depression.* New York: Guilford Press; 1998.
